# Supplementary material
Source: PubMed Central journal article supplement (PMC6434132)
Supplement: IAI.00705-18-s0001.pdf [file IAI.00705-18-s0001.pdf]

**Table S1. List of primers used for quantitative real-time PCR analysis**

|                         | <b>Sense primer (5'-3')</b>   | <b>Antisense primer (5'-3')</b>  |
|-------------------------|-------------------------------|----------------------------------|
| <b>mouse</b>            |                               |                                  |
| CXCL2                   | CACTCTCAAGGGCGGTCAAA          | AGGCACATCAGGTACGATCCA            |
| CSF2                    | AAAGAAGCCCTGAACCTCC           | GCCCTTGAGTTTGGTGAA               |
| NOS2                    | AGACGGATAGGCAGAGATTGG         | ACTGACACTTCGCACAAAGC             |
| IL-10                   | AGCATGGCCCAGAAATCAAG          | AGAAATCGATGACAGCGCCT             |
| IFN $\gamma$            | GCCAAGTTTGAGGTCAACAAC         | ATCAGCAGCGACTCCTTTTC             |
| TNF $\alpha$            | CGAATTCAGTGGAGCCTCGAA         | TGAGGAAGGCTGTGCATTGC             |
| IL-25                   | TCAACAGCAGGGCCATCTCT          | GTTGTGGTAAAGTGGGACGGA            |
| IL-33                   | CCGTTCTGGCCTCACATAA           | CCTTGGATGCTCAATGTGTCA            |
| <b><i>C. parvum</i></b> |                               |                                  |
| cdg2_FLc_0220           | GCTTCTGGTATTCCTTCTTGCGT       | GGTCACCAAGGAACGTTTACAGAG         |
| cdg2_FLc_0170           | ATTCGCAGTGTGTACCGAAATGGAGATCT | CATACACTAAGCTAAATGAAGGATGGAGTCGT |
| cdg7_FLc_1180           | TTTATCAACTGTTTTTGAAACG        | CCAGATTCTGTAATCATTCTTC           |
| cdg2_FLc_0160           | CAGATCGTTCGGATGTTTAATAA       | GGTCAGGTACAAGACCAAATTATGT        |
| cdg3_FLc_0370           | ATTAGAAAATATTGCACAAGAACCAAT   | TAATTGTTTGGCCTACCATTGTA          |
| cdg6_FLc_0830           | ACCTAGTCTAGATCTGCTGCATCAGC    | GACAGAAGGGAACCTTCTTGCTCG         |
| cdg4_FLc_0580           | GTTACGGCAATCTTCTTCATCTG       | CCTAATACCAAACAGCCAAATAA          |
| cdg1_FLc_0040           | GGAGTTGCATCCAACTTCTTGCTCC     | CCGCATGGTTTTCTTCTCGTATGAC        |
| cdg6_FLc_0810           | CAATAGAGTTGGTATTAGAGATTCCAAA  | AAAATGAACAGCTTAAAGATTTTAGAA      |
| cdg7_FLc_0990           | ACTCTTATCACCGCCAATACCGCT      | GGGAACAAAGTGGTTTACTCTCCTGTGG     |
| cdg4_FLc_0440           | ACCAGGTATTTCTGTAAGCCCGTG      | CAGATCCTTGGTCTCCTGTTCCA          |
| cdg7_FLc_1000           | TCCATAGACAATAAAGTGGGTT        | TCTGTTAGGTGGCGTTAGTT             |
| cdg3_FLc_0300           | CTCGTTGATACAGAGCTGCTTCCT      | CAAGCCACGTTTCGAAAATAGAC          |
| cdg3_FLc_0400           | AAGTGGGTATGTTTGGAAGCTCCC      | CGAAGGGTCGGAGTCAGAAGATT          |
| cdg5_FLc_0610           | CCACGGAATCTTCTGGAATATA        | CAGCACAAAAGAAGAGTAGATCC          |
| cdg7_FLc_0970           | ACCATTGAGAACGCAGAAGAAAGGAGGC  | CGGTTTGTTCGTTGCGGTAAAAGTCG       |
| cdg7_FLc_0960           | ACTGCTATATGAAATTATTGCTA       | TGCTATAGGCTATAATATCAAAA          |
| cdg7_FLc_0910           | CTCTTTCAAGCCCAATTCCACATCCACC  | GCCAAGAGTGCGGTGTTCAGAACAT        |
| cdg2_FLc_0240           | TTATACTATTGTGAAGATTACGGC      | AACTACGGAACAATTATTCACAG          |
| cdg7_FLc_0900           | TCTTTGATCGCCATTTTCATTAAT      | TTCCGCATTCTCGTCTATTACAA          |
| cdg4_FLc_0460           | GACTCAGATGCAGATAGAAGACGG      | GTCTGTTGAAGCAAGAATGCATG          |
| cdg4_FLc_0500           | CGATGGTTCCAATGATGCAGATGTGC    | GGCGTAAACCGTATGTTTGGGAACCT       |
| cdg2_FLc_0220           | GCTTCTGGTATTCCTTCTTGCGT       | GGTCACCAAGGAACGTTTACAGAG         |
| cdg6_FLc_0690           | GGAGAACCCAGTGATAATGTCTG       | CAACAGCCTCACCCCATGATAAAG         |
| cdg2_FLc_0190           | TCTGGGGGTATCGGAAATCTATCACC    | CAAAGTTGGCGTAGGATGCTCAGT         |

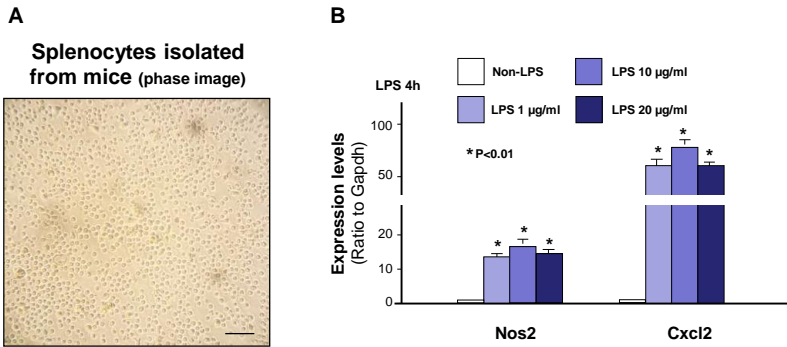

**Figure-S1.** Expression levels of inflammatory genes in primary splenocytes in response to LPS stimulation. Splenocytes isolated from mice under phase microscope (A) and displayed a marked induction of inflammatory genes following LPS stimulation for 4 h (B). Data represent means  $\pm$  SEs from 3 independent experiments. \*P<.01 ANOVA versus non-LPS control. Scale bar = 50  $\mu$ m.

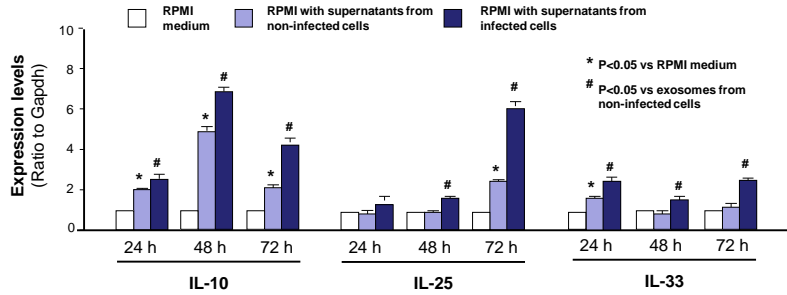

**Figure S2.** Induction of Il-10, Il-25, and Il-33 in splenocytes after incubation with supernatants of *C. parvum*-infected intestinal epithelial cell cultures. IEC4.1 cells were exposed to *C. parvum* infection for 24 h. Supernatants were then collected and added to the medium for primary splenocytes. Supernatants from non-infected intestinal epithelial cell cultures were used for control. Expression levels of selected inflammatory genes in splenocytes were quantified by using real-time PCR. Data represent means  $\pm$  SEs from 3 independent experiments. \*P<.05 ANOVA versus incubation with PRMI medium; #P<.05 ANOVA versus incubation with exosomes from non-infected cells.

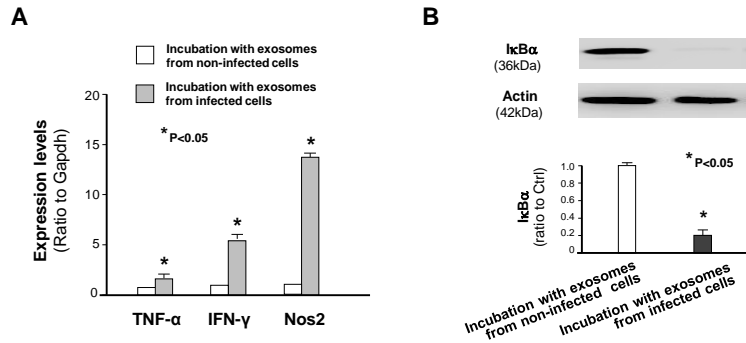

**Figure S3.** Induction of inflammatory responses in RAW264.7 cells following incubation with exosomes released from *C. parvum*-infected intestinal epithelial cell cultures. (A) Upregulation of selected inflammatory genes was detected in RAW264.7 cells following incubation with exosomes isolated from *C. parvum*-infected IEC4.1 cell cultures. IEC4.1 cells were exposed to *C. parvum* infection for 24 h and supernatants were then collected, and exosomes isolated. Exosomes were then added to the medium for RAW264.7 cells for incubation of 48 h. Supernatants from non-infected intestinal epithelial cell cultures were used for control. Expression levels of selected inflammatory genes were quantified by using real-time PCR. (B) Degradation of I $\kappa$ B $\alpha$  in RAW264.7 cells following incubation with exosomes isolated from infected IEC4.1 cell cultures. Exosomes were isolated from the supernatants of IEC4.1 cell cultures following *C. parvum* infection for 24 h. Exosomes were then added to the medium for RAW264.7 cells for incubation of 48 h, followed by Western blot for I $\kappa$ B $\alpha$  in the splenocytes. Representative gel images are shown and densitometric levels were quantified. Data represent means  $\pm$  SEs from 3 independent experiments. \* $P < .05$  *t* test versus incubation with exosomes from non-infected cells.
